# Supplementary figures and images for: Study on the adsorption of ammonia nitrogen with the best modified zeolite
Source: Research Square preprint supplement (doi:10.21203/rs.3.rs-6141997/v1), 2025-05-08

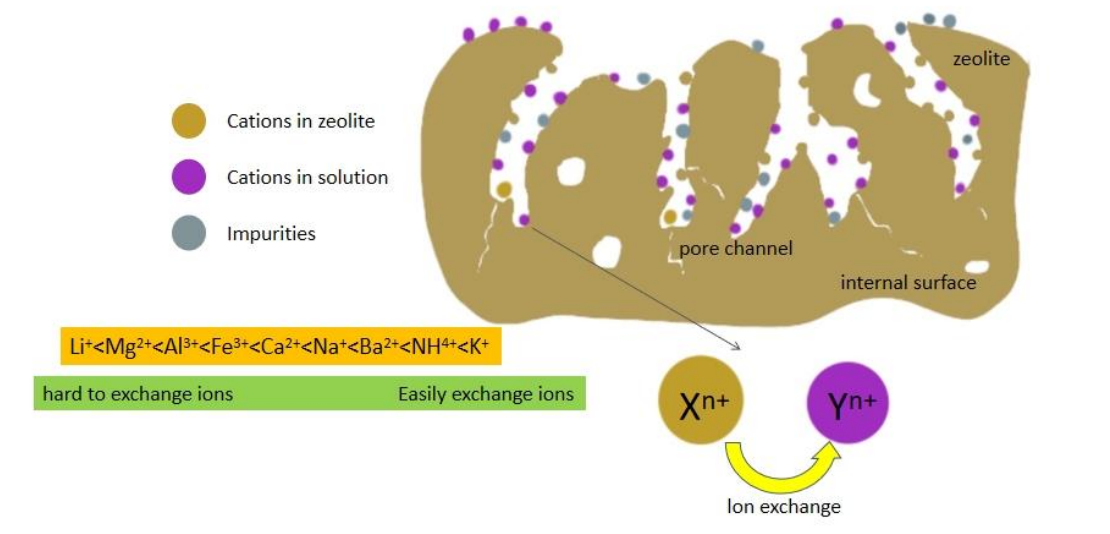

Supplement: Supplementary file 1 [file 316f32988fb223e264b1cb3a.pdf]
